# Supplementary material
Source: PubMed Central journal article supplement (PMC10644252)
Supplement: jamacardiol-e234680-s002.pdf [file jamacardiol-e234680-s002.pdf]

## Data Sharing Statement

Liu. Neighborhood Environmental Burden and Cardiovascular Health in the US. *JAMA Cardiol.*  
Published November 13, 2023. doi:10.1001/jamacardio.2023.4680

### Data

**Data available:** No

### Additional Information

**Explanation for why data not available:** All data used in this study are publicly available for free to reserachers
